# Supplementary material for: Clinical Validity of Anti-Proteinase 3 Antibodies in Patients with Inflammatory Bowel Disease: A Short Meta-Analysis
Source: MDPI journal article supplement (doi:10.3390/diagnostics13243682), 2023-12-16
Supplement: s1 [file s1]

Supplementary Figure S1. Electronic searches.

| PUBMED SEARCH  |                                                                                                                                                                             |         |                  |
|----------------|-----------------------------------------------------------------------------------------------------------------------------------------------------------------------------|---------|------------------|
| Search Name:   | anti-PR3 antibodies in IBD                                                                                                                                                  |         |                  |
| Date Run:      | June 6, 2023                                                                                                                                                                |         |                  |
| ID             | Search                                                                                                                                                                      | Results | Hits             |
| #1             | Search: ((Inflammatory bowel disease[MeSH Major Topic]) OR (Crohn's disease[MeSH Major Topic])) OR (Ulcerative colitis[MeSH Major Topic])                                   | 83912   | TARGET CONDITION |
| #2             | Search: (((PR3-ANCA[Title/Abstract]) OR (Anti-PR3 antibodies[Title/Abstract])) OR (Anti-proteinase 3 antibodies[Title/Abstract])) OR (cANCA/PR3 antibodies[Title/Abstract]) | 900     | INDEX TEST       |
| #3             | Search: #1 AND #2                                                                                                                                                           | 21      |                  |
| Pubmed results |                                                                                                                                                                             | 21      |                  |

| SCOPUS SEARCH  |                                                                                                 |         |                  |
|----------------|-------------------------------------------------------------------------------------------------|---------|------------------|
| Search Name:   | anti-PR3 antibodies in IBD                                                                      |         |                  |
| Date Run:      | June 6, 2023                                                                                    |         |                  |
| ID             | Search                                                                                          | Results | Hits             |
| #1             | inflammatory AND bowel AND disease OR crohn's AND disease OR ulcerative AND colitis             | 171744  | TARGET CONDITION |
| #2             | anti-pr3 AND antibodies OR anca-pr3 OR anti-proteinase 3 antibodies OR canca/pr3 AND antibodies | 662     | INDEX TEST       |
| #3             | #1 AND #2                                                                                       | 80      |                  |
| Scopus results |                                                                                                 | 80      |                  |

| WEB OF SCIENCE         |                                                                                                                    |         |                  |
|------------------------|--------------------------------------------------------------------------------------------------------------------|---------|------------------|
| Search Name:           | anti-PR3 antibodies in IBD                                                                                         |         |                  |
| Date Run:              | June 6, 2023                                                                                                       |         |                  |
| ID                     | Search                                                                                                             | Results | Hits             |
| #1                     | ((AB=(Inflammatory bowel disease)) OR AB=(Crohn's disease)) OR AB=(Ulcerative colitis)                             | 82986   | TARGET CONDITION |
| #2                     | ((((AB=(anti-PR3 antibodies)) OR AB=(anti-proteinase 3 antibodies)) OR AB=(cANCA/PR3 antibodies)) OR AB=(PR3-ANCA) | 916     | INDEX TEST       |
| #3                     | #1 AND #2                                                                                                          | 48      |                  |
| Web of science results |                                                                                                                    | 48      |                  |
